# Supplementary material
Source: publisher site journal article supplement (https://www.dovepress.com/article/613969)
Supplement: Supplementary file 1 [file 613969_IJCOPD%20supple%20CLEAN.docx]

**SUPPLEMENTARY INFORMATION**

**TITLE: Association Between Improvement in Institutional COPD Quality Assessment Grade and Risk of Acute Exacerbations in Primary and Secondary Care: A Nationwide Claims-Based Study**

Sung Woo Moon et al.

**Table S1.** **Performance indicators and grade classification of the HIRA COPD Quality Assessment Program**

| Part A. Eligible institutions and patients | | | | | |
| --- | --- | --- | --- | --- | --- |
| Eligible institutions | Healthcare institutions billing outpatient services for COPD (ICD-10 J43, J44, excluding J43.0) under the national health insurance, medical aid, or veterans' benefits programs. | | | | |
| Eligible patients | Patients aged ≥40 years with either (a) at least two outpatient visits with a COPD medication prescription, or (b) one hospitalization requiring systemic corticosteroid administration followed by an outpatient visit with a COPD medication prescription. | | | | |
| Exclusion | Patients who died during the assessment period were excluded from all denominators. | | | | |
| Part B. Key performance indicators used for grading | | | | | |
| Indicator | Weight | | Numerator | Denominator | |
| PFT rate | 0.4 | | Number of eligible COPD patients who underwent at least one PFT during the assessment period (procedure codes F6001 or F6002). | Total number of eligible COPD patients. | |
| Rate of continuous outpatient visits | 0.2 | | Number of patients with ≥3 COPD-related outpatient visits at the same institution during the assessment period. | Patients who consistently received care from a single institution throughout the evaluation period and visited the same institution at the end of the previous year (patients receiving care from multiple institutions were excluded). | |
| Inhaled bronchodilator prescription rate | 0.4 | | Number of patients prescribed at least one inhaled bronchodilator (LABA, SABA, or LAMA) during the assessment period. | Total number of eligible COPD patients. | |
| Part C. Monitoring indicators (not used in grade calculation) | | | | | |
| COPD-related hospitalization rate | | Number of patients with ≥1 COPD-related hospitalization, identified by a COPD diagnosis as primary or first secondary diagnosis and prescription of a COPD-related medication during the hospital stay (admissions at both index and external institutions included). | | | Total number of eligible COPD patients. |
| COPD-related ER visit rate | | Number of patients with ≥1 COPD-related ER visit, identified by a COPD diagnosis as primary or first secondary diagnosis, prescription of COPD-related medication, and an associated emergency medical care fee code (visits at both index and external institutions included). | | | Total number of eligible COPD patients. |
| Part D. Composite score and grade classification | | | | | |
| Composite performance score (100-point scale) = (PFT rate × 0.4) + (continuous outpatient visit rate × 0.2) + (inhaled bronchodilator prescription rate × 0.4). | | | | | |
| Grade | Composite score | | | | |
| Grade 1 | ≥80 points | | | | |
| Grade 2 | 65–79.9 points | | | | |
| Grade 3 | 50–64.9 points | | | | |
| Grade 4 | 35–49.9 points | | | | |
| Grade 5 | <35 points | | | | |
| A lower grade number indicates higher quality of care. | | | | | |
